# Supplementary material for: Role of Patient and Practice Characteristics in Variance of Treatment Quality in Type 2 Diabetes between General Practices
Source: PubMed Central journal article supplement (PMC5091743; doi:10.1371/journal.pone.0166012), 2016-11-02
Supplement: pone.0166012.s001.pdf [file pone.0166012.s001.pdf]

S1 Appendix. Proportion of variance in treatment attributed to practice level with percentage reduction compared to empty model (%)

| Model                                     | Treatment with glucose-lowering drugs |                      | Treatment with metformin   |                      | Treatment with lipid-lowering drugs |                      | Treatment with statins     |                      | Treatment with blood pressure-lowering drugs |                      | Treatment with RAAS-blockers |                      |
|-------------------------------------------|---------------------------------------|----------------------|----------------------------|----------------------|-------------------------------------|----------------------|----------------------------|----------------------|----------------------------------------------|----------------------|------------------------------|----------------------|
|                                           | Variance at practice level            | % explained variance | Variance at practice level | % explained variance | Variance at practice level          | % explained variance | Variance at practice level | % explained variance | Variance at practice level                   | % explained variance | Variance at practice level   | % explained variance |
| Empty                                     | 7.53                                  |                      | 3.60                       |                      | 3.13                                |                      | 10.26                      |                      | 8.55                                         |                      | 3.89                         |                      |
| Age included                              | 7.56                                  | -0.40                | 3.39                       | 5.83                 | 3.01                                | 3.83                 | 10.2                       | 0.58                 | 8.53                                         | 0.23                 | 3.85                         | 1.03                 |
| Gender included                           | 7.54                                  | -0.13                | 3.54                       | 1.67                 | 3.08                                | 1.60                 | 10.06                      | 1.95                 | 8.55                                         | 0.00                 | 3.79                         | 2.57                 |
| Diabetes duration included                | 7.48                                  | 0.66                 | 3.52                       | 2.22                 | 3.13                                | 0.00                 | 10.26                      | 0.00                 | 8.57                                         | -0.23                | 3.83                         | 1.54                 |
| Hypertension included                     | 7.52                                  | 0.13                 | 3.60                       | 0.00                 | 3.14                                | -0.32                | 10.27                      | -0.10                | NA                                           | NA                   | NA                           | NA                   |
| Dyslipidemia included                     | 7.53                                  | 0.00                 | 3.60                       | 0.00                 | NA                                  | NA                   | NA                         | NA                   | 8.61                                         | -0.70                | 3.91                         | -0.51                |
| Nephropathy included                      | 7.52                                  | 0.13                 | NA                         | NA                   | NA                                  | NA                   | NA                         | NA                   | NA                                           | NA                   | NA                           | NA                   |
| Overweight included                       | 7.51                                  | 0.27                 | 3.64                       | -1.11                | 3.15                                | -0.64                | 10.24                      | 0.19                 | 8.63                                         | -0.94                | 3.96                         | -1.80                |
| Cardiovascular comorbidity included       | 7.61                                  | -1.06                | 3.67                       | -1.94                | NA                                  | NA                   | NA                         | NA                   | NA                                           | NA                   | NA                           | NA                   |
| Peripheral vascular comorbidity included  | 7.53                                  | 0.00                 | 3.65                       | -1.39                | NA                                  | NA                   | NA                         | NA                   | NA                                           | NA                   | NA                           | NA                   |
| Diabetes complication included            | 7.64                                  | -1.46                | 3.64                       | -1.11                | 3.11                                | 0.64                 | 10.12                      | 1.36                 | 8.48                                         | 0.82                 | 3.90                         | -0.26                |
| Malignancy included                       | 7.48                                  | 0.66                 | 3.66                       | -1.67                | 3.09                                | 1.28                 | 10.48                      | -2.14                | 8.48                                         | 0.82                 | 3.88                         | 0.26                 |
| Psychological disorder included           | 7.45                                  | 1.06                 | 3.61                       | -0.28                | 3.11                                | 0.64                 | 10.25                      | 0.10                 | 8.23                                         | 3.74                 | 3.85                         | 1.03                 |
| ≥5 chronic drugs included                 | 7.54                                  | -0.13                | 3.36                       | 6.67                 | 3.16                                | -0.96                | 10.18                      | 0.78                 | 8.49                                         | 0.70                 | 3.90                         | -0.26                |
| ≥3 glucose-lowering drugs included        | NA                                    | NA                   | NA                         | NA                   | 3.04                                | 2.88                 | 10.25                      | 0.10                 | 8.42                                         | 1.52                 | 3.89                         | 0.00                 |
| ≥2 lipid-lowering drugs included          | 7.50                                  | 0.40                 | 3.61                       | -0.28                | NA                                  | NA                   | NA                         | NA                   | 8.52                                         | 0.35                 | 3.86                         | 0.77                 |
| ≥4 blood pressure-lowering drugs included | 7.48                                  | 0.66                 | 3.58                       | 0.56                 | 3.10                                | 0.96                 | 10.25                      | 0.10                 | NA                                           | NA                   | NA                           | NA                   |
| Solo practice                             | 7.31                                  | 2.92                 | 3.60                       | 0.00                 | 3.12                                | 0.32                 | 10.03                      | 2.24                 | 8.56                                         | -0.12                | 3.88                         | 0.26                 |
| Assistant presence                        | 7.25                                  | 3.72                 | 3.60                       | 0.00                 | 3.13                                | 0.00                 | 9.64                       | 6.04                 | 8.55                                         | 0.00                 | 3.82                         | 1.80                 |
| Number of T2DM patients per practice      | 6.54                                  | 13.15                | 3.62                       | -0.56                | 2.95                                | 5.75                 | 10.28                      | -0.19                | 8.18                                         | 4.33                 | 3.66                         | 5.91                 |
| Model 1: patient characteristics          | 7.28                                  | 3.32                 | 3.33                       | 7.50                 | 2.82                                | 9.90                 | 10.23                      | 0.29                 | 8.02                                         | 6.20                 | 3.61                         | 7.20                 |
| Model 2: practice characteristics         | 6.36                                  | 15.54                | 3.62                       | -0.56                | 2.87                                | 8.31                 | 9.64                       | 6.04                 | 8.18                                         | 4.33                 | 3.66                         | 5.91                 |
| Model 3: patient and practice             | 6.10                                  | 18.99                | 3.33                       | 7.50                 | 2.50                                | 20.13                | 9.64                       | 6.04                 | 7.70                                         | 9.94                 | 3.37                         | 13.37                |

NA implies that characteristic was not included in the model since it was either an inclusion criterion for or part of the treatment measure
