# Supplementary material for: Role of Patient and Practice Characteristics in Variance of Treatment Quality in Type 2 Diabetes between General Practices
Source: PubMed Central journal article supplement (PMC5091743; doi:10.1371/journal.pone.0166012), 2016-11-02
Supplement: pone.0166012.s002.pdf [file pone.0166012.s002.pdf]

S2 Appendix. Description of the codelists and information required to run the algorithms

|                        |         |                                                                                  |
|------------------------|---------|----------------------------------------------------------------------------------|
| gp double              | % 10.0g | General practice GIANTT code                                                     |
| patient double         | % 10.0g | Patient identifier at general practice                                           |
| solo_gp double         | % 1.0g  | Solo GP practies (yes/no)                                                        |
| assistant double       | % 1.0g  | Presence of practice assistant (yes/no)                                          |
| female double          | % 1.0g  | Female gender (yes/no)                                                           |
| nephropathy double     | % 1.0g  | History of nephropathy diagnosis according to ICPC-1 classification (yes/no)     |
| polypharmacy_~c double | % 1.0g  | Use of 5 or more chronic drugs (yes/no)                                          |
| polypharmacy~gl double | % 1.0g  | Use of 3 or more drug from different glucose-lowering drug class (yes/no)        |
| polypharmacy~ll double | % 1.0g  | Use of 2 or more drug from different lipid-lowering drug class (yes/no)          |
| polypharmacy_~h double | % 1.0g  | Use of 4 or more drug from different glucose-lowering drug class (yes/no)        |
| hypertension double    | % 1.0g  | History of hypertension diagnosis according to ICPC-1 classification (yes/no)    |
| dyslipidemia double    | % 1.0g  | History of dyslipidemia diagnosis according to ICPC-1 classification (yes/no)    |
| overweight double      | % 1.0g  | Overweighth diagnosis according to ICPC-1 classification (yes/no)                |
| antidm_2012_cat double | % 1.0g  | Use of glucose-lowering treatment in the last 4 months of 2012                   |
| metformin_201~t double | % 1.0g  | Use of metformin in the last 4 months of 2012                                    |
| antilip_2012_~t double | % 1.0g  | Use of lipid-lowering treatment in the last 4 months of 2012                     |
| statins_2012_~t double | % 1.0g  | Use of statins in the last 4 months of 2012                                      |
| antihyp_2012_~t double | % 1.0g  | Use of blood pressure-lowering treatment in the last 4 months of 2012            |
| ras_2012_cat double    | % 1.0g  | Use of ACE-i or ARB in the last 4 months of 2012                                 |
| cvd_cat1 double        | % 1.0g  | History of cardiovascular diagnoses according to ICPC-1 classification (yes/no)  |
| pvd_cat1 double        | % 1.0g  | History of peropheral vascular diagnosis according to ICPC-1 classification (yes |
| diabcl_cat1 double     | % 1.0g  | History of diabetes complications according to ICPC-1 classification (yes/no)    |
| malig_cat1 double      | % 1.0g  | History of malignancy diagnosis according to ICPC-1 classification (yes/no)      |
| psy_cat1 double        | % 1.0g  | History of psychological diagnosis according to ICPC-1 classification (yes/no)   |
| age_70 double          | % 1.0g  | Age >= 70 (yes/no)                                                               |

|                       |        |                                                          |
|-----------------------|--------|----------------------------------------------------------|
| age_80 double         | % 1.0g | Age >= 80 (yes/no)                                       |
| duration_over2 double | % 1.0g | Diabetes duration >= 2 years (yes/no)                    |
| n_pat_gp float        | % 9.0g | Number of type 2 diabetes patient per practice (numeric) |
| Sorted by: gp patient |        |                                                          |
